# Supplementary material for: Integration of enzyme activities into metabolic flux distributions by elementary mode analysis
Source: PubMed Central journal article supplement (PMC1973080; doi:10.1186/1752-0509-1-31), 2007-07-18
Supplement: 1752-0509-1-31-S1.pdf [file 1752-0509-1-31-S1.pdf]

### A plain instruction for ECF

To explain the ECF method intelligibly, it is applied to a plain network model where the EMCs are not uniquely determined. The flux of  $v_1$  is fixed to 100.

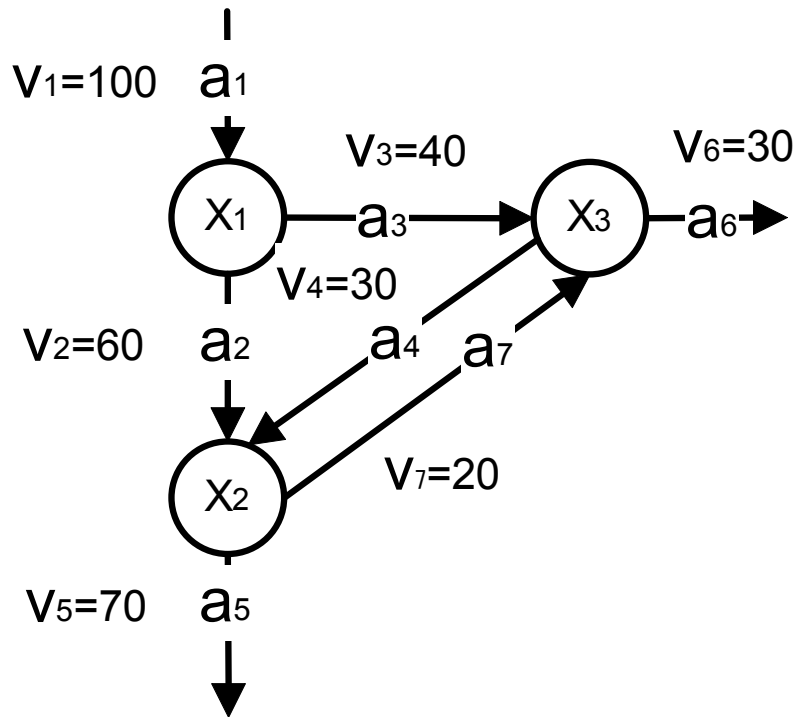

The flux distribution of  $\mathbf{v} = (v_1, v_2, \dots, v_7)^t$  is decomposed into five elementary modes:

$$\begin{pmatrix} v_1 \\ v_2 \\ v_3 \\ v_4 \\ v_5 \\ v_6 \\ v_7 \end{pmatrix} = \lambda_1 \begin{pmatrix} 1 \\ 1 \\ 0 \\ 0 \\ 1 \\ 0 \\ 0 \end{pmatrix} + \lambda_2 \begin{pmatrix} 1 \\ 0 \\ 1 \\ 0 \\ 0 \\ 1 \\ 0 \end{pmatrix} + \lambda_3 \begin{pmatrix} 1 \\ 0 \\ 1 \\ 1 \\ 1 \\ 0 \\ 0 \end{pmatrix} + \lambda_4 \begin{pmatrix} 1 \\ 1 \\ 0 \\ 0 \\ 0 \\ 1 \\ 1 \end{pmatrix} + \lambda_5 \begin{pmatrix} 0 \\ 0 \\ 0 \\ 1 \\ 0 \\ 0 \\ 1 \end{pmatrix}$$

or

$$\begin{pmatrix} 100 \\ 60 \\ 40 \\ 30 \\ 70 \\ 30 \\ 20 \end{pmatrix} = \begin{pmatrix} 1 & 1 & 1 & 1 & 0 \\ 1 & 0 & 0 & 1 & 0 \\ 0 & 1 & 1 & 0 & 0 \\ 0 & 0 & 1 & 0 & 1 \\ 1 & 0 & 1 & 0 & 0 \\ 0 & 1 & 0 & 1 & 0 \\ 0 & 0 & 0 & 1 & 1 \end{pmatrix} \begin{pmatrix} \lambda_1 \\ \lambda_2 \\ \lambda_3 \\ \lambda_4 \\ \lambda_5 \end{pmatrix} = \mathbf{P} \cdot \mathbf{c},$$

where  $\mathbf{P}$  is the elementary mode matrix and  $\mathbf{c} = (\lambda_1, \lambda_2, \dots, \lambda_5)^t$  is the EMC vector of wild type.

Ten EMC vectors for wild type  $(\mathbf{r}_1, \mathbf{r}_2, \dots, \mathbf{r}_{10})$  are calculated by maximizing or minimizing each  $\lambda_i$  ( $i = 1, 2, \dots, 5$ ) as follows:

$$(\mathbf{r}_1, \mathbf{r}_2, \dots, \mathbf{r}_{10}) = \begin{pmatrix} 60 & 40 & 60 & 40 & 40 & 60 & 40 & 60 & 60 & 40 \\ 30 & 10 & 30 & 10 & 10 & 30 & 10 & 30 & 30 & 10 \\ 10 & 30 & 10 & 30 & 30 & 10 & 30 & 10 & 10 & 30 \\ 0 & 20 & 0 & 20 & 20 & 0 & 20 & 0 & 0 & 20 \\ 20 & 0 & 20 & 0 & 0 & 20 & 0 & 20 & 20 & 0 \end{pmatrix}.$$

In a mutant, the activity of  $a_2$  is reduced to a half (0.5) and that of  $a_4$  is 2-fold enhanced. The relative enzyme activity of a mutant to wild type is given by:

$$(\theta_p) = \begin{pmatrix} 1 \\ 0.5 \\ 1 \\ 2 \\ 1 \\ 1 \\ 1 \end{pmatrix}$$

The matrix  $(\alpha_{pi})$  is provided by:

$$(\alpha_{pi}) = \begin{pmatrix} 1 & 1 & 1 & 1 & 1 \\ 0.5 & 1 & 1 & 0.5 & 1 \\ 1 & 1 & 1 & 1 & 1 \\ 1 & 1 & 2 & 1 & 2 \\ 1 & 1 & 1 & 1 & 1 \\ 1 & 1 & 1 & 1 & 1 \\ 1 & 1 & 1 & 1 & 1 \end{pmatrix}.$$

For the first and second columns for  $(\mathbf{r}_1, \mathbf{r}_2, \dots, \mathbf{r}_{10})$ , the intermediate EMC vectors for the mutant are given by:

$$\mathbf{inter\_r}_1^{mutant} = \begin{pmatrix} 30 \\ 30 \\ 20 \\ 0 \\ 40 \end{pmatrix} = \begin{pmatrix} 60 \cdot 0.5^1 \\ 30 \\ 10 \cdot 2^1 \\ 0 \\ 20 \cdot 2^1 \end{pmatrix} \quad \text{and} \quad \mathbf{inter\_r}_2^{mutant} = \begin{pmatrix} 20 \\ 10 \\ 60 \\ 10 \\ 0 \end{pmatrix} = \begin{pmatrix} 40 \cdot 0.5^1 \\ 10 \\ 30 \cdot 2^1 \\ 20 \cdot 0.5^1 \\ 0 \end{pmatrix},$$

respectively, where  $\beta$  is set to 1. The others are calculated in the same manner. The resulting intermediate EMCs of  $\{\mathbf{inter\_r}_j^{mutant} \mid j = 1, 2, \dots, 10\}$  are provided by:

$$\begin{aligned}
& (\mathbf{inter\_r}_1^{mutant}, \mathbf{inter\_r}_2^{mutant}, \dots, \mathbf{inter\_r}_{10}^{mutant}) \\
& = \begin{pmatrix} 30 & 20 & 30 & 20 & 20 & 30 & 20 & 30 & 30 & 20 \\ 30 & 10 & 30 & 10 & 10 & 30 & 10 & 30 & 30 & 10 \\ 20 & 60 & 20 & 60 & 60 & 20 & 60 & 20 & 20 & 60 \\ 0 & 10 & 0 & 10 & 10 & 0 & 10 & 0 & 0 & 10 \\ 40 & 0 & 40 & 0 & 0 & 40 & 0 & 40 & 40 & 0 \end{pmatrix}
\end{aligned}$$

For the vector of each column, the EMC vectors of the mutant  $\{\mathbf{r}_j^{mutant} \mid j = 1, 2, \dots, 10\}$  are calculated. Here, the first and second columns are used to calculate  $\mathbf{r}_1^{mutant}$  and  $\mathbf{r}_2^{mutant}$  as follows:

$$\mathbf{r}_1^{mutant} = \begin{pmatrix} 37.5 \\ 37.5 \\ 25 \\ 0 \\ 50 \end{pmatrix} = \frac{100}{(1, 0, 0, 0, 0, 0, 0)} \cdot \begin{pmatrix} \begin{pmatrix} 1 & 1 & 1 & 1 & 0 \\ 1 & 0 & 0 & 1 & 0 \\ 0 & 1 & 1 & 0 & 0 \\ 0 & 0 & 1 & 0 & 1 \\ 1 & 0 & 1 & 0 & 0 \\ 0 & 1 & 0 & 1 & 0 \\ 0 & 0 & 0 & 1 & 1 \end{pmatrix} \cdot \begin{pmatrix} 30 \\ 30 \\ 20 \\ 0 \\ 40 \end{pmatrix} \\ \begin{pmatrix} 30 \\ 30 \\ 20 \\ 0 \\ 40 \end{pmatrix} \end{pmatrix}$$

and

$$\mathbf{r}_2^{mutant} = \begin{pmatrix} 20 \\ 10 \\ 60 \\ 10 \\ 0 \end{pmatrix} = \frac{100}{(1, 0, 0, 0, 0, 0, 0)} \cdot \begin{pmatrix} \begin{pmatrix} 1 & 1 & 1 & 1 & 0 \\ 1 & 0 & 0 & 1 & 0 \\ 0 & 1 & 1 & 0 & 0 \\ 0 & 0 & 1 & 0 & 1 \\ 1 & 0 & 1 & 0 & 0 \\ 0 & 1 & 0 & 1 & 0 \\ 0 & 0 & 0 & 1 & 1 \end{pmatrix} \cdot \begin{pmatrix} 20 \\ 10 \\ 60 \\ 10 \\ 0 \end{pmatrix} \\ \begin{pmatrix} 20 \\ 10 \\ 60 \\ 10 \\ 0 \end{pmatrix} \end{pmatrix},$$

respectively. The flux distributions of the mutant,  $\mathbf{v}_1^{mutant}$  and  $\mathbf{v}_2^{mutant}$ , are calculated as follows:

$$\mathbf{v}_1^{mutant} = \begin{pmatrix} 1 & 1 & 1 & 1 & 0 \\ 1 & 0 & 0 & 1 & 0 \\ 0 & 1 & 1 & 0 & 0 \\ 0 & 0 & 1 & 0 & 1 \\ 1 & 0 & 1 & 0 & 0 \\ 0 & 1 & 0 & 1 & 0 \\ 0 & 0 & 0 & 1 & 1 \end{pmatrix} \begin{pmatrix} 100 \\ 37.5 \\ 37.5 \\ 25 \\ 0 \\ 50 \end{pmatrix} = \begin{pmatrix} 100 \\ 37.5 \\ 62.5 \\ 75 \\ 62.5 \\ 37.5 \\ 50 \end{pmatrix}.$$

and

$$\mathbf{v}_2^{mutant} = \begin{pmatrix} 1 & 1 & 1 & 1 & 0 \\ 1 & 0 & 0 & 1 & 0 \\ 0 & 1 & 1 & 0 & 0 \\ 0 & 0 & 1 & 0 & 1 \\ 1 & 0 & 1 & 0 & 0 \\ 0 & 1 & 0 & 1 & 0 \\ 0 & 0 & 0 & 1 & 1 \end{pmatrix} \begin{pmatrix} 100 \\ 20 \\ 10 \\ 60 \\ 10 \\ 0 \end{pmatrix} = \begin{pmatrix} 100 \\ 30 \\ 70 \\ 60 \\ 80 \\ 20 \\ 10 \end{pmatrix},$$

respectively. The other flux distributions are calculated in the same manner. The mean flux for the mutant is provided by:

$$\mathbf{v}_{mean}^{mutant} = \frac{1}{10} \sum_{j=1}^{10} \mathbf{v}_j^{mutant} = \begin{pmatrix} 100 \\ 33.75 \\ 66.25 \\ 67.5 \\ 71.25 \\ 28.75 \\ 30 \end{pmatrix}.$$
