# Supplementary material for: Integration of enzyme activities into metabolic flux distributions by elementary mode analysis
Source: PubMed Central journal article supplement (PMC1973080; doi:10.1186/1752-0509-1-31), 2007-07-18
Supplement: 1752-0509-1-31-S2.pdf [file 1752-0509-1-31-S2.pdf]

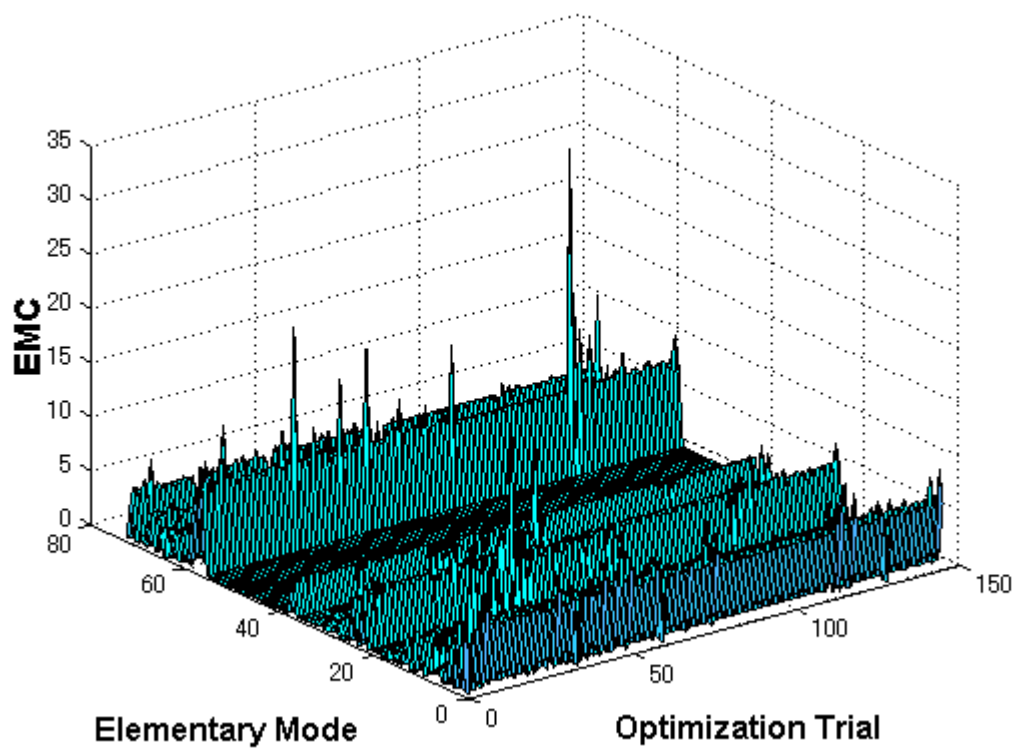

**Supplementary Figure 1** Estimation of 73 EMCs in central metabolic pathways of wild type  
The EMCs with respect to the  $(2j-1)$  and  $2j$ -th optimization trial are calculated by maximizing or minimizing the  $j$ -th EMC ( $j=1,2,\dots,73$ ).
