# Supplementary material for: Integration of enzyme activities into metabolic flux distributions by elementary mode analysis
Source: PubMed Central journal article supplement (PMC1973080; doi:10.1186/1752-0509-1-31), 2007-07-18
Supplement: 1752-0509-1-31-S3.pdf [file 1752-0509-1-31-S3.pdf]

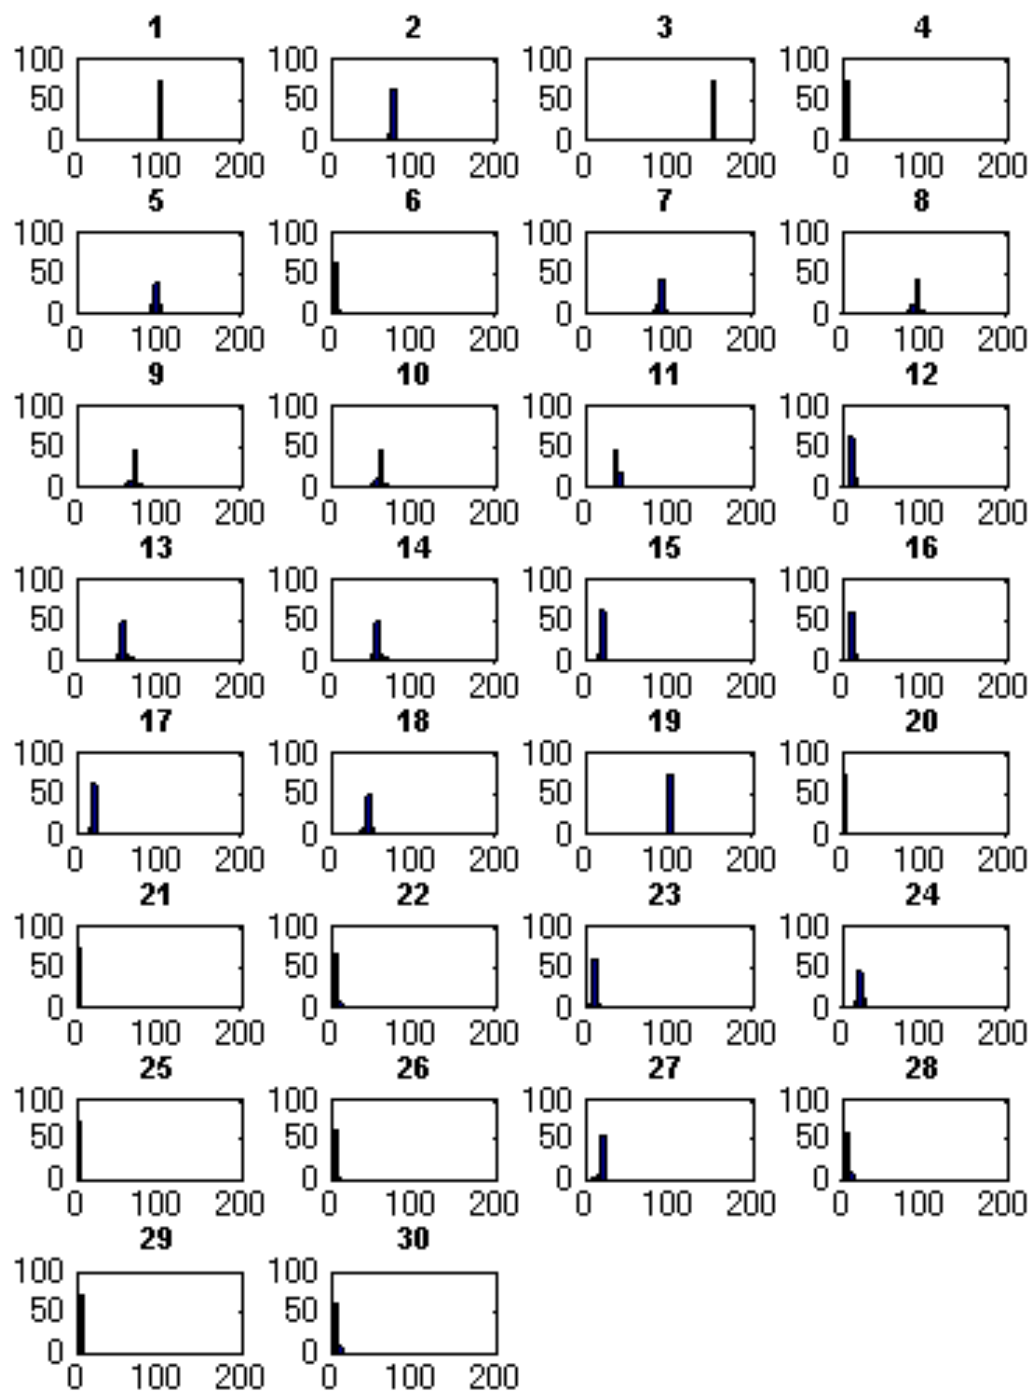

**Supplementary Figure 2** Frequency distributions for the estimated flux in the *pykF(-)* knockout mutant

The reaction number is above each figure (**Table 1**). The horizontal axis indicates the flux and the vertical axis is the frequency.
