# Supplementary material for: Integration of enzyme activities into metabolic flux distributions by elementary mode analysis
Source: PubMed Central journal article supplement (PMC1973080; doi:10.1186/1752-0509-1-31), 2007-07-18
Supplement: 1752-0509-1-31-S4.pdf [file 1752-0509-1-31-S4.pdf]

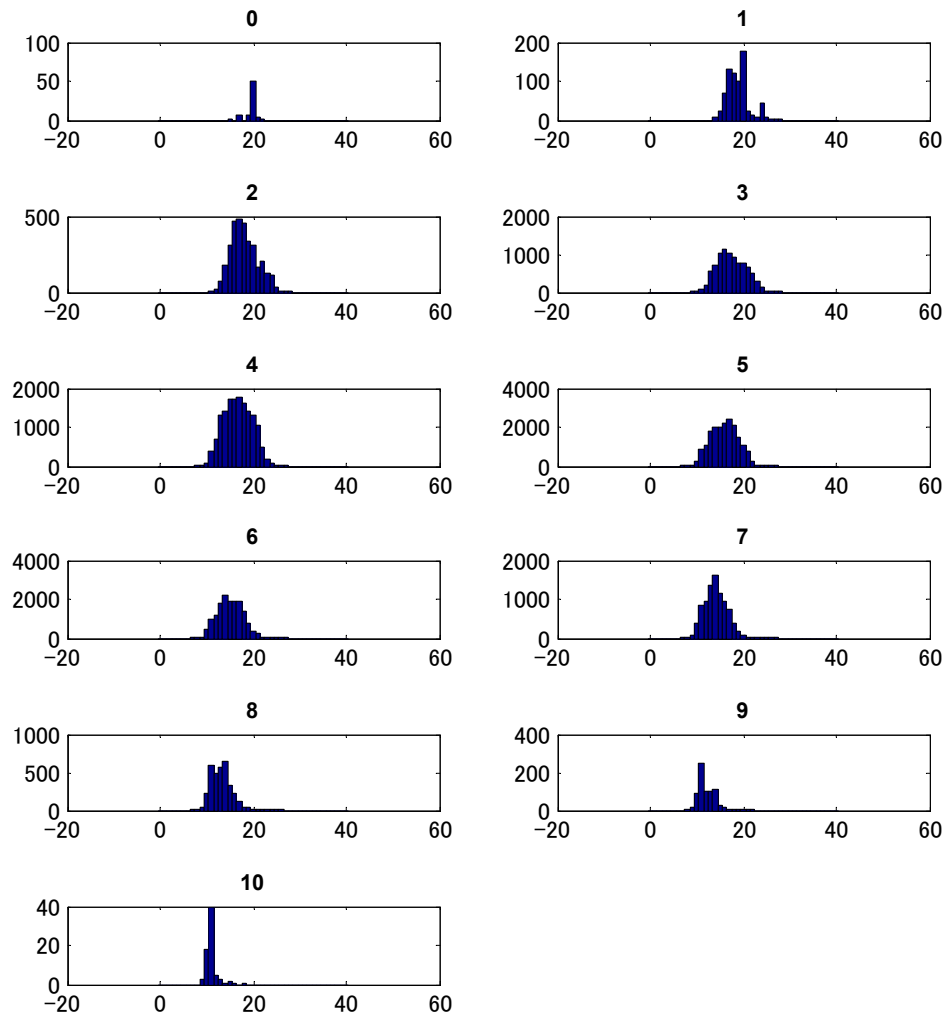

**Supplementary Figure 3** Frequency distributions for the model error in the *pykF(-)* knockout mutant

The number of integrated enzymes is described above each figure. The horizontal axis indicates the model error and the vertical axis is the frequency.
