# Supplementary material for: Integration of enzyme activities into metabolic flux distributions by elementary mode analysis
Source: PubMed Central journal article supplement (PMC1973080; doi:10.1186/1752-0509-1-31), 2007-07-18
Supplement: 1752-0509-1-31-S5.pdf [file 1752-0509-1-31-S5.pdf]

## Data for the *B. subtilis* metabolic network

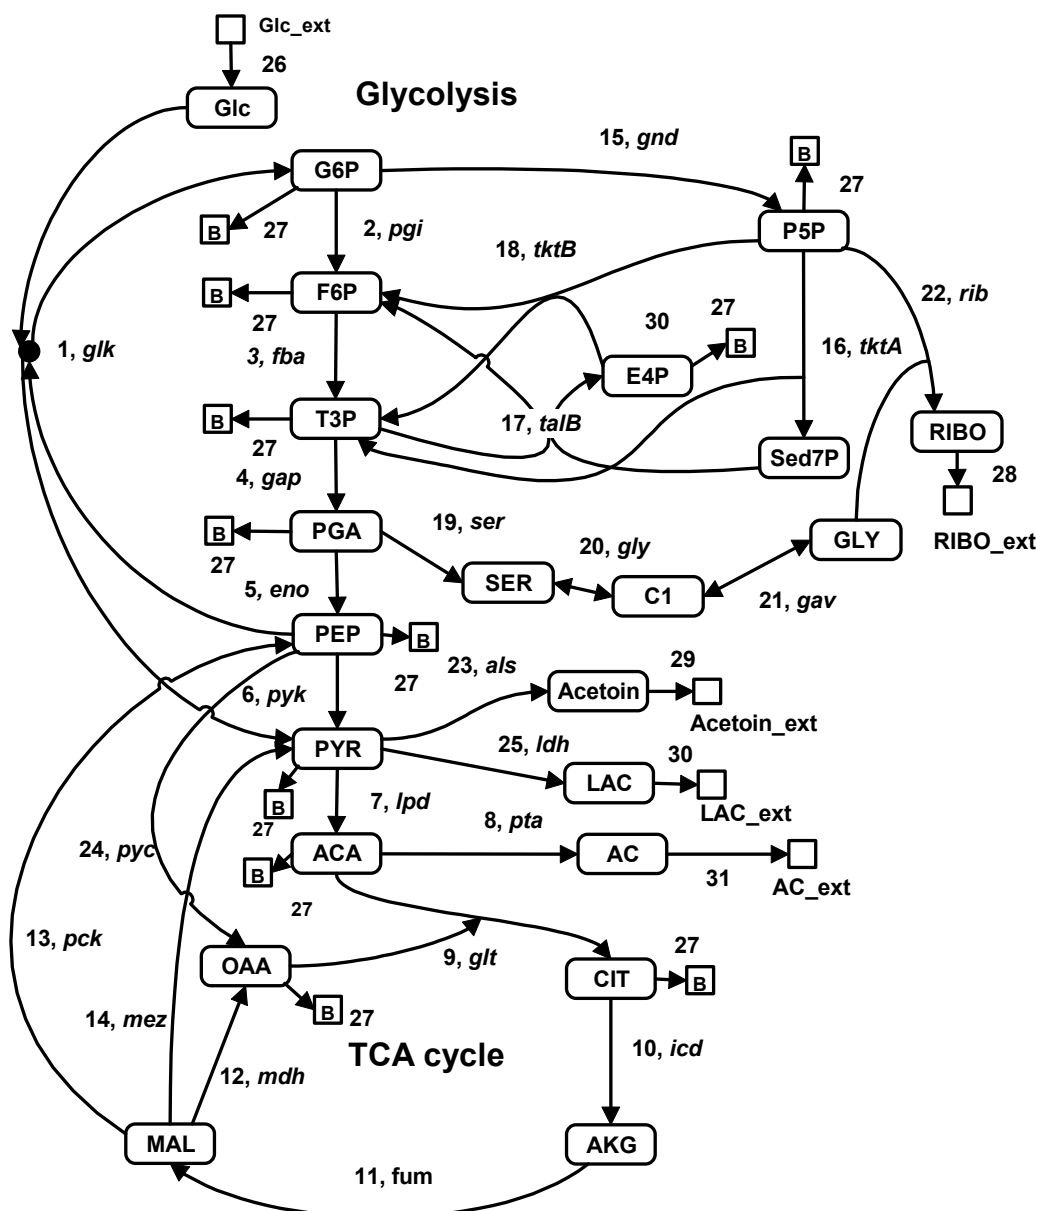

### Supplementary Figure 4 *Bacillus subtilis* central metabolic network

The numbers in the figure are those of reactions shown in **Supplementary Table 1**. The gene name is representative of the genes related to the reaction. The metabolites indicated by squares, e.g., B (biomass), Glc\_ext (environmental glucose) and Ac\_ext (environmental acetate), are external. All other metabolites, enclosed by rounded rectangles, are internal.

*B. subtilis* is an important model microorganism in the field of metabolic engineering for the production of riboflavin or acetoin [1]. A typical biochemical network was reconstructed where there are 30 metabolites and 31 reactions for *B. subtilis* grown on glucose. The *pta(-)* knockout and acetolactate synthase (*als*) overexpressing mutant of *B. subtilis* RH33::[pRB63] was denoted as *B. subtilis* RH36 which was constructed from parental strain *B. subtilis* RH33 [2]. The flux distributions and enzyme activities of wild type (*B. subtilis* RH33) and mutant (*B. subtilis* RH36) were presented (**Supplementary Table 2**).

1. Sauer U, Cameron DC, Bailey JE: **Metabolic capacity of *Bacillus subtilis* for the production of purine nucleosides, riboflavin, and folic acid.** *Biotechnol Bioeng* 1998, **59**(2):227-238.
2. Zhu Y, Chen X, Chen T, Zhao X: **Enhancement of riboflavin production by overexpression of acetolactate synthase in a *pta* mutant of *Bacillus subtilis*.** *FEMS Microbiol Lett* 2007, **266**(2):224-230.

**Supplementary Table 1 Reactions from the *B. subtilis* central metabolic network for the production of riboflavin and acetoin**

Abbreviation: GLC Glucose; G6P Glucose-6-phosphate; F6P Fructose-6-phosphate; T3P Glyceraldehyde-3-phosphate; PGA 3-phosphoglyceric acid; PEP Phosphoenol pyruvate; SED7P Seduheptulose-7-phosphate; E4P Erythrose-4-phosphate; RIBO Riboflavin; GLY Glycine; SER Serine; PYR Pyruvate; ACA Acetyl coenzyme; AC Acetate; Cit Citrate; OAA Oxaloacetate ; MAL Malate; FUM Fumarate ; C1 Methyl group bound to tetrahydrofolate ; P5P Pentose-5-phosphate; LAC Lactate; Glc\_ext External glucose; RIBO\_ext Riboflavin external; Acetoin\_ext Acetoin external; LAC\_ext Lactate external; AC\_ext Acetate external.

| Reaction | Gene name                         | Enzyme                                                                                                          | Chemical reaction       |
|----------|-----------------------------------|-----------------------------------------------------------------------------------------------------------------|-------------------------|
| 1        | <i>glk</i>                        | Glucokinase                                                                                                     | GLC => G6P              |
| 2        | <i>pgi</i>                        | Phosphoglucosomerase                                                                                            | G6P <=> F6P             |
| 3        | <i>pfkA, pfkB<br/>fba<br/>tpi</i> | Phosphofructokinase<br>Fructose-16-bisphosphatase aldolase<br>Triphosphate isomerase                            | F6P => 2 T3P            |
| 4        | <i>gapA<br/>pgk<br/>gpmA</i>      | Glyceraldehyde-3-phosphate dehydrogenase<br>Phosphoglycerate kinase<br>Phosphoglycerate mutase I                | T3P <=> PGA             |
| 5        | <i>eno</i>                        | Enolase                                                                                                         | PGA <=> PEP             |
| 6        | <i>pyk</i>                        | Pyruvate kinase                                                                                                 | PEP => PYR              |
| 7        | <i>lpd</i>                        | Pyruvate dehydrogenase                                                                                          | PYR => ACA + CO2        |
| 8        | <i>pta, ackA</i>                  | Acetyl-CoA synthetase                                                                                           | ACA => AC               |
| 9        | <i>gltA</i>                       | Citrate synthase                                                                                                | OAA + ACA => CIT + CO2  |
| 10       | <i>icdA<br/>suc, lpd<br/>sdhC</i> | Isocitrate dehydrogenase<br>2-ketoglutarate dehydrogenase<br>Succinyl-CoA synthetase<br>Succinate dehydrogenase | CIT => FUM + CO2        |
| 11       | <i>fum</i>                        | Fumarate hydratase                                                                                              | FUM <=> MAL             |
| 12       | <i>mdh</i>                        | Malate dehydrogenase                                                                                            | MAL <=> OAA             |
| 13       | <i>pck</i>                        | Phosphoenolpyruvate carboxykinase                                                                               | OAA => PEP + CO2        |
| 14       | <i>mae</i>                        | Malic enzyme                                                                                                    | MAL => PYR + CO2        |
| 15       | <i>gnd</i>                        | 6-phosphoglyconate dehydrogenase                                                                                | G6P => P5P + CO2        |
| 16       | <i>rpi<br/>rpe<br/>tptA</i>       | Ribose-5-phosphate isomerase A<br>Ribose phosphate 3-epimerase<br>Transketolase I                               | 2 P5P <=> S7P + T3P     |
| 17       | <i>talB</i>                       | Transaldolase B                                                                                                 | S7P + T3P <=> F6P + E4P |
| 18       | <i>tktB</i>                       | Transketolase II                                                                                                | P5P + E4P <=> F6P + T3P |
| 19       | <i>ser</i>                        | 3-phosphoglyceric acid dehydrogenase                                                                            | PGA => SER              |
| 20       | <i>gly</i>                        | Serine hydroxymethyltransferase                                                                                 | SER <=> GLY + C1        |
| 21       | <i>gcv</i>                        | Glycine synthase                                                                                                | C1 + CO2 <=> GLY        |
| 22       | <i>rib</i>                        | Riboflavin kinase                                                                                               | 3 P5P + GLY => RIBO     |
| 23       | <i>als</i>                        | Acetolactate synthase                                                                                           | 2 PYR => Acetoin        |
| 24       | <i>pyc</i>                        | Pyruvate carboxylase                                                                                            | PYR + CO2 => OAA        |
| 25       | <i>ldh</i>                        | Lactate dehydrogenase                                                                                           | PYR => LAC              |
| 26       | -                                 | Glucose uptake                                                                                                  | Glc_ext => GLC          |
| 27       | -                                 | Materials are used for biomass synthesis.                                                                       | => Biomass              |
| 28       | -                                 | Membrane transport reaction                                                                                     | RIBO => RIBO_ext        |
| 29       | -                                 | Membrane transport reaction                                                                                     | Acetoin => Acetoin_ext  |
| 30       | -                                 | Membrane transport reaction                                                                                     | LAC => LAC_ext          |
| 31       | -                                 | Membrane transport reaction                                                                                     | AC => AC_ext            |

**Supplementary Table 2 Experimental data of flux and enzyme activities in wild type and the mutant in *B. subtilis***

The glucose uptake flux was normalized to 100. The relative enzyme activities in the mutant were normalized by those in the wild type. Enzymes were extracted from the cultured cells and their activities were measured *in vitro*.

|    | Flux in the wild type | Flux in the mutant | Relative enzyme activities in the mutant |
|----|-----------------------|--------------------|------------------------------------------|
| 1  | 100.0                 | 100.0              | 1                                        |
| 2  | 40.8                  | 43.8               | 1                                        |
| 3  | 71.7                  | 72.9               | 1                                        |
| 4  | 157.3                 | 158.9              | 1                                        |
| 5  | 148.0                 | 149.9              | 1                                        |
| 6  | 143.9                 | 146.0              | 1                                        |
| 7  | 108.0                 | 34.5               | 1                                        |
| 8  | 83.7                  | 0.0                | 0.0001                                   |
| 9  | 11.9                  | 22.7               | 3.3                                      |
| 10 | 5.7                   | 16.8               | 2.3                                      |
| 11 | 5.7                   | 16.8               | 1                                        |
| 12 | 5.7                   | 16.7               | 1                                        |
| 13 | 0.0                   | 0.0                | 1                                        |
| 14 | 0.0                   | 0.1                | 1                                        |
| 15 | 58.3                  | 55.3               | 0.8                                      |
| 16 | 16.8                  | 15.9               | 1                                        |
| 17 | 16.9                  | 15.9               | 1                                        |
| 18 | 15.1                  | 14.2               | 1                                        |
| 19 | 1.3                   | 1.2                | 1                                        |
| 20 | 1.3                   | 1.2                | 1                                        |
| 21 | 0.4                   | 0.4                | 1                                        |
| 22 | 1.6                   | 1.6                | 1                                        |
| 23 | 0.6                   | 39.1               | 4.9                                      |
| 24 | 17.3                  | 16.7               | 1                                        |
| 25 | 0.4                   | 0.4                | 0.8                                      |
| 26 | 100.0                 | 100.0              | 1                                        |
| 27 | 5.8                   | 5.5                | 1                                        |
| 28 | 1.6                   | 1.6                | 1                                        |
| 29 | 0.6                   | 39.1               | 1                                        |
| 30 | 0.4                   | 0.4                | 1                                        |
| 31 | 83.7                  | 0.0                | 1                                        |
